# Supplementary material
Source: MDPI journal article supplement (https://www.mdpi.com/2071-1050/9/10/1708)
Supplement: s1 [file s1]

### Questionnaire on the Visual Preference for School Building Geometry Parameters

We would like to know your visual preferences for the geometry parameters of school buildings. The questionnaire is anonymous, and the results will only be used for our research. Thank you for your valuable time.

Please score the following questions according to your subjective feeling; the score is divided into seven levels. (-3 = strongly disapproval, -2 = disapproval, -1 = slightly disagree, 0 = neutral, +1 = slightly agree, +2 = agree, +3 = strongly agree, please mark  $\surd$  under your option.)

#### 1. Do you like the shape of the following school buildings? Please give your opinion.

|                     |           |    |    |    |   |    |    |    |
|---------------------|-----------|----|----|----|---|----|----|----|
| Rectangle           | Figure a) | -3 | -2 | -1 | 0 | +1 | +2 | +3 |
| L shape             | Figure b) | -3 | -2 | -1 | 0 | +1 | +2 | +3 |
| C shape             | Figure c) | -3 | -2 | -1 | 0 | +1 | +2 | +3 |
| H shape             | Figure d) | -3 | -2 | -1 | 0 | +1 | +2 | +3 |
| H shape with atrium | Figure e) | -3 | -2 | -1 | 0 | +1 | +2 | +3 |
| Courtyard           | Figure f) | -3 | -2 | -1 | 0 | +1 | +2 | +3 |
| Highrise            | Figure g) | -3 | -2 | -1 | 0 | +1 | +2 | +3 |

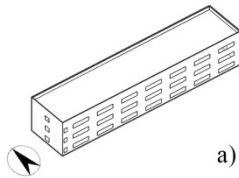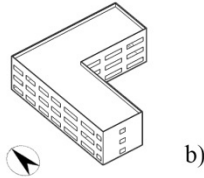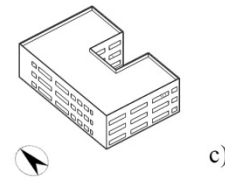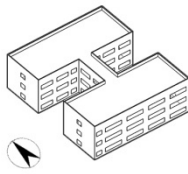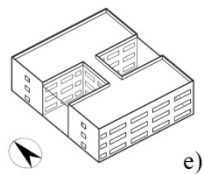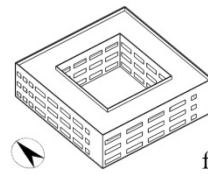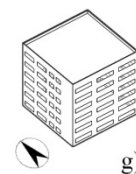

#### 2. Do you like the facades of the following school buildings in terms of window to wall ratio (WWR)? Please give your opinion.

|          |           |    |    |    |   |    |    |    |
|----------|-----------|----|----|----|---|----|----|----|
| WWR: 10% | Figure a) | -3 | -2 | -1 | 0 | +1 | +2 | +3 |
| WWR: 20% | Figure b) | -3 | -2 | -1 | 0 | +1 | +2 | +3 |
| WWR: 30% | Figure c) | -3 | -2 | -1 | 0 | +1 | +2 | +3 |
| WWR: 40% | Figure d) | -3 | -2 | -1 | 0 | +1 | +2 | +3 |
| WWR: 50% | Figure e) | -3 | -2 | -1 | 0 | +1 | +2 | +3 |
| WWR: 60% | Figure f) | -3 | -2 | -1 | 0 | +1 | +2 | +3 |
| WWR: 70% | Figure g) | -3 | -2 | -1 | 0 | +1 | +2 | +3 |
| WWR: 80% | Figure h) | -3 | -2 | -1 | 0 | +1 | +2 | +3 |
| WWR: 90% | Figure i) | -3 | -2 | -1 | 0 | +1 | +2 | +3 |

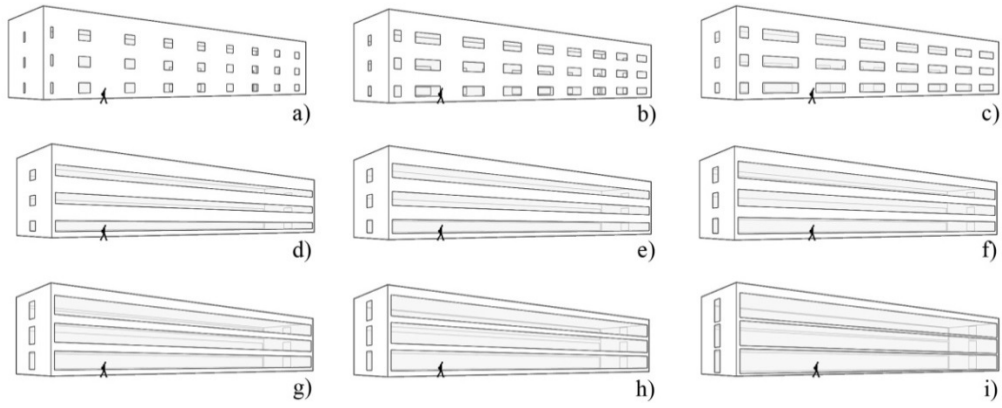

**3. Do you like the following classrooms in terms of room depth? Please give your opinion.**

|                 |           |    |    |    |   |    |    |    |
|-----------------|-----------|----|----|----|---|----|----|----|
| Room depth: 6m  | Figure a) | -3 | -2 | -1 | 0 | +1 | +2 | +3 |
| Room depth: 8m  | Figure b) | -3 | -2 | -1 | 0 | +1 | +2 | +3 |
| Room depth: 10m | Figure c) | -3 | -2 | -1 | 0 | +1 | +2 | +3 |
| Room depth: 12m | Figure d) | -3 | -2 | -1 | 0 | +1 | +2 | +3 |

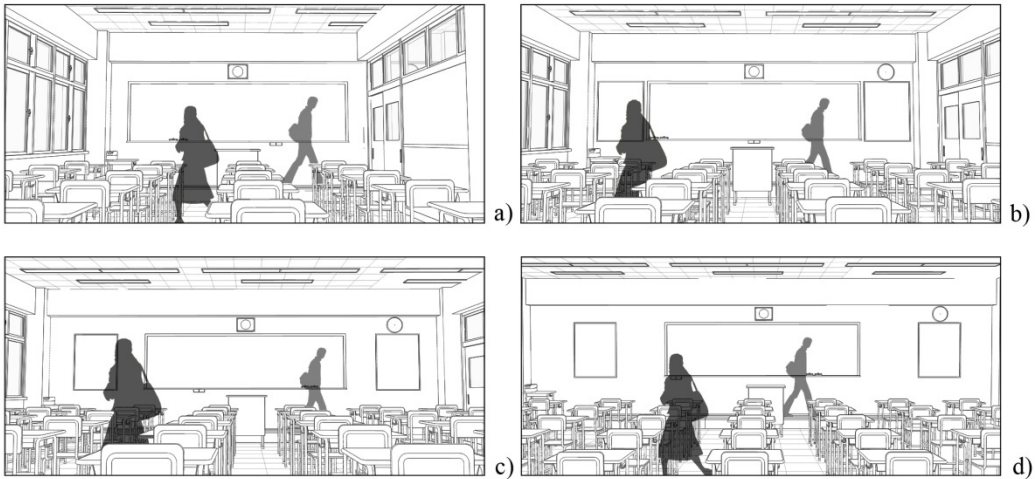

**4. Which orientation would you like the school buildings face? Please give your opinion.**

|       |    |    |    |   |    |    |    |
|-------|----|----|----|---|----|----|----|
| South | -3 | -2 | -1 | 0 | +1 | +2 | +3 |
| West  | -3 | -2 | -1 | 0 | +1 | +2 | +3 |
| North | -3 | -2 | -1 | 0 | +1 | +2 | +3 |
| East  | -3 | -2 | -1 | 0 | +1 | +2 | +3 |

**5. Which of the following design parameters do you pay more attention on? Please give your opinion.**

|                |    |    |    |   |    |    |    |
|----------------|----|----|----|---|----|----|----|
| Building shape | -3 | -2 | -1 | 0 | +1 | +2 | +3 |
| WWR            | -3 | -2 | -1 | 0 | +1 | +2 | +3 |
| Room depth     | -3 | -2 | -1 | 0 | +1 | +2 | +3 |
| Orientation    | -3 | -2 | -1 | 0 | +1 | +2 | +3 |

**6. Do you think the above design parameters (building shape, WWR, classroom depth and building orientation) will have an effect on your study or work? Please give your opinion.**

- a) obviously effect      b) maybe      c) obviously no effect

Your basic situation:

Gender:  Male  Female

Age:  <10  10 - 20  20 - 30  30 - 40  40 - 50  >50

Education:  Primary school  Junior high school  High school  Undergraduate  Master and above

Identity:  student  teacher  student parents  other
